# Supplementary material for: Gadolinium-oxide nanoparticles for cryogenic magnetocaloric applications
Source: PubMed Central journal article supplement (PMC8831503; doi:10.1038/s41598-022-06132-8), 2022-02-10
Supplement: 41598_2022_6132_MOESM1_ESM.pdf [file 41598_2022_6132_MOESM1_ESM.pdf]

## SUPPLEMENTARY INFORMATION

### Gadolinium-oxide nanoparticles for cryogenic magnetocaloric application

A. Zeleňáková<sup>a\*</sup>, P. Hrubovčák<sup>a,b</sup>, A. Berkutova<sup>a</sup>, O. Šofranko<sup>a</sup>, N. Kučerka<sup>b,c</sup>, O. Ivankov<sup>b,d</sup>, A. Kuklin<sup>b,e</sup>, V. Girman<sup>a</sup>, V. Zeleňák<sup>f</sup>

<sup>a</sup>*Institute of Physics, P.J. Šafárik University, Park Angelinum 9, 04001 Košice, Slovakia*

<sup>b</sup>*Frank Laboratory of Neutron Physics, Joint Institute for Nuclear Research, Joliot-Curie 6, Dubna, 141980 Russia*

<sup>c</sup>*Comenius University in Bratislava, Department of Physical Chemistry of Drugs, Mlynská dolina, 832 32 Bratislava, Slovakia*

<sup>d</sup>*Institute for Safety Problems of Nuclear Power Plants NAS of Ukraine, Kyiv Ukraine*

<sup>e</sup>*Moscow Institute of Physics and Technology, Institutsky per. 9, Dolgoprudny, Moscow Region, 141700, Russia*

<sup>f</sup>*Institute of Chemistry, Faculty of Science, P.J. Šafárik University, Moyzesova 11, 041 54 Košice, Slovakia*

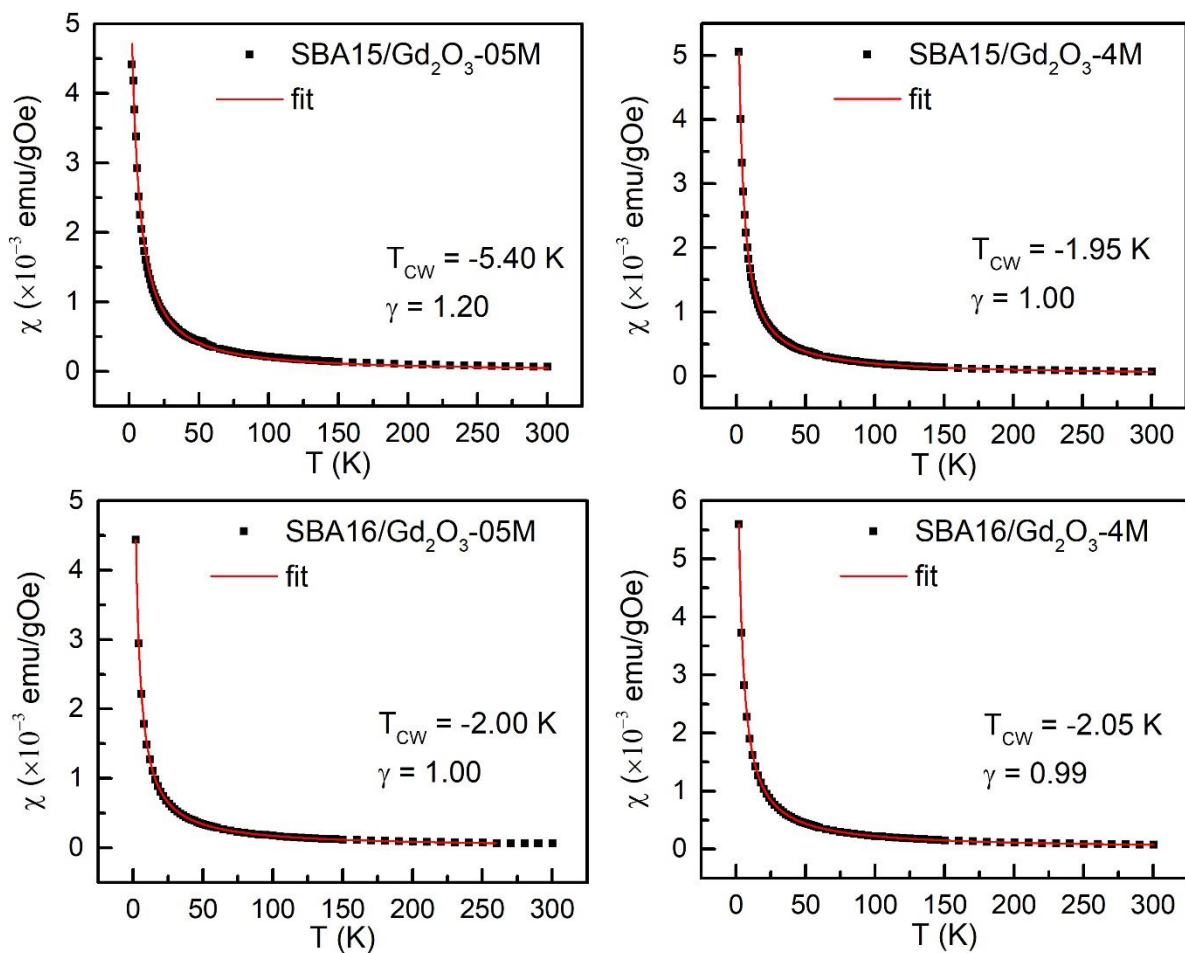

**Supplementary Fig. 1** Susceptibility (black squares) of the systems SBA15/ $\text{Gd}_2\text{O}_3$ -0.5M; 4M and SBA16/ $\text{Gd}_2\text{O}_3$ -0.5M; 4M calculated from the magnetization obtained in ZFC regime in the applied static field 100 Oe. Red lines represent the best fits to the experimental data according to the Curie-Weiss law  $\chi=C/(T-T_{CW})^\gamma$ , where  $C$  and  $T_{CW}$  is Curie-Weiss constant and temperature, respectively.

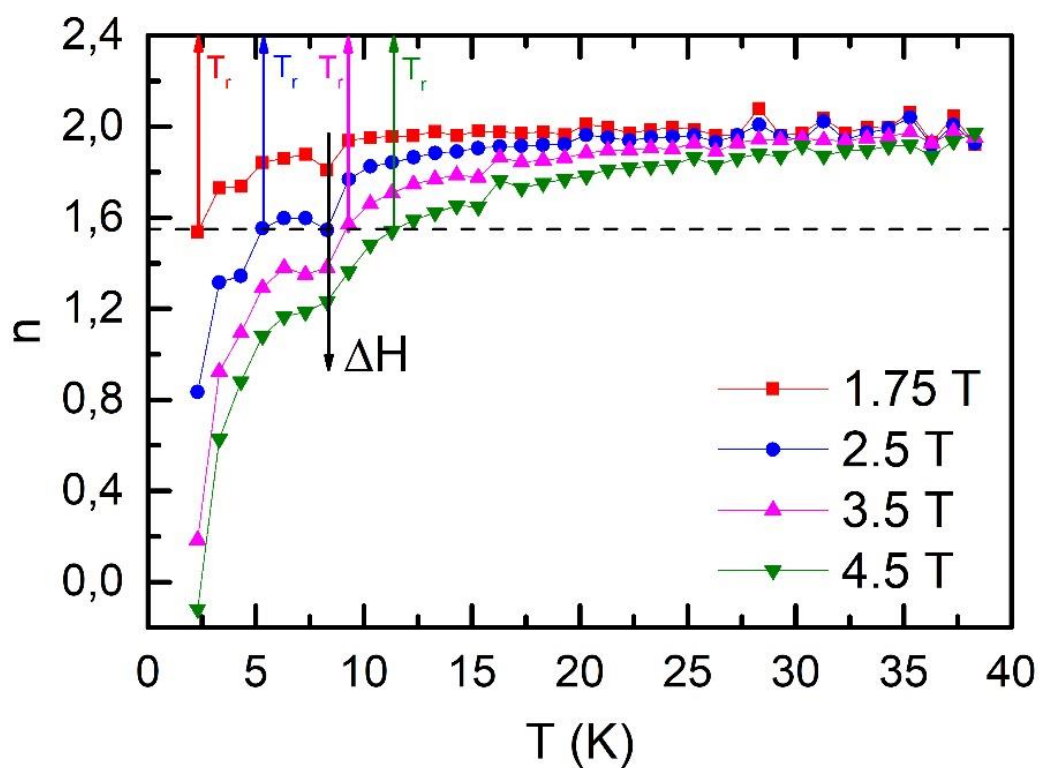

**Supplementary Fig. 2** Temperature and applied field change dependence of the exponent  $n$  calculated for the system SBA16/Gd<sub>2</sub>O<sub>3</sub>-4M. The reference temperatures  $T_r$  have been determined as the temperatures corresponding to the value  $n = 1.55$  (dashed line) of each  $n(T)$  curve. Black arrow indicates applied field change dependence of  $n(T)$  local minimum.
